# Supplementary material for: Effects of oxide platforms on the dynamics and reduction characteristics of hydrogen spillover
Source: Royal Society of Chemistry journal article supplement (doi:10.1039/d4cp03093a), 2024-01-01
Supplement: d4cp03093a1.pdf [file d4cp03093a1.pdf]

## Supporting Information

### Effects of Oxide Platforms on the Dynamics and Reduction Characteristics of Hydrogen Spillover

Kazuki Shun<sup>†</sup>, Akihito Fujimoto<sup>†</sup>, Kohsuke Mori<sup>\*,†,‡</sup>, Hiromi Yamashita<sup>†,‡</sup>

<sup>†</sup> Division of Materials and Manufacturing Science, Graduate School of Engineering, Osaka University, 2-1 Yamada-oka, Suita, Osaka 565-0871, Japan. Tel & FAX: +81-6-6879-7460, +81-6-6879-7457

E-mail: mori@mat.eng.osaka-u.ac.jp

<sup>‡</sup> Innovative Catalysis Science Division, Institute for Open and Transdisciplinary Research Initiatives (ICS-OTRI), Osaka University, Suita, Osaka 565-0871, Japan.

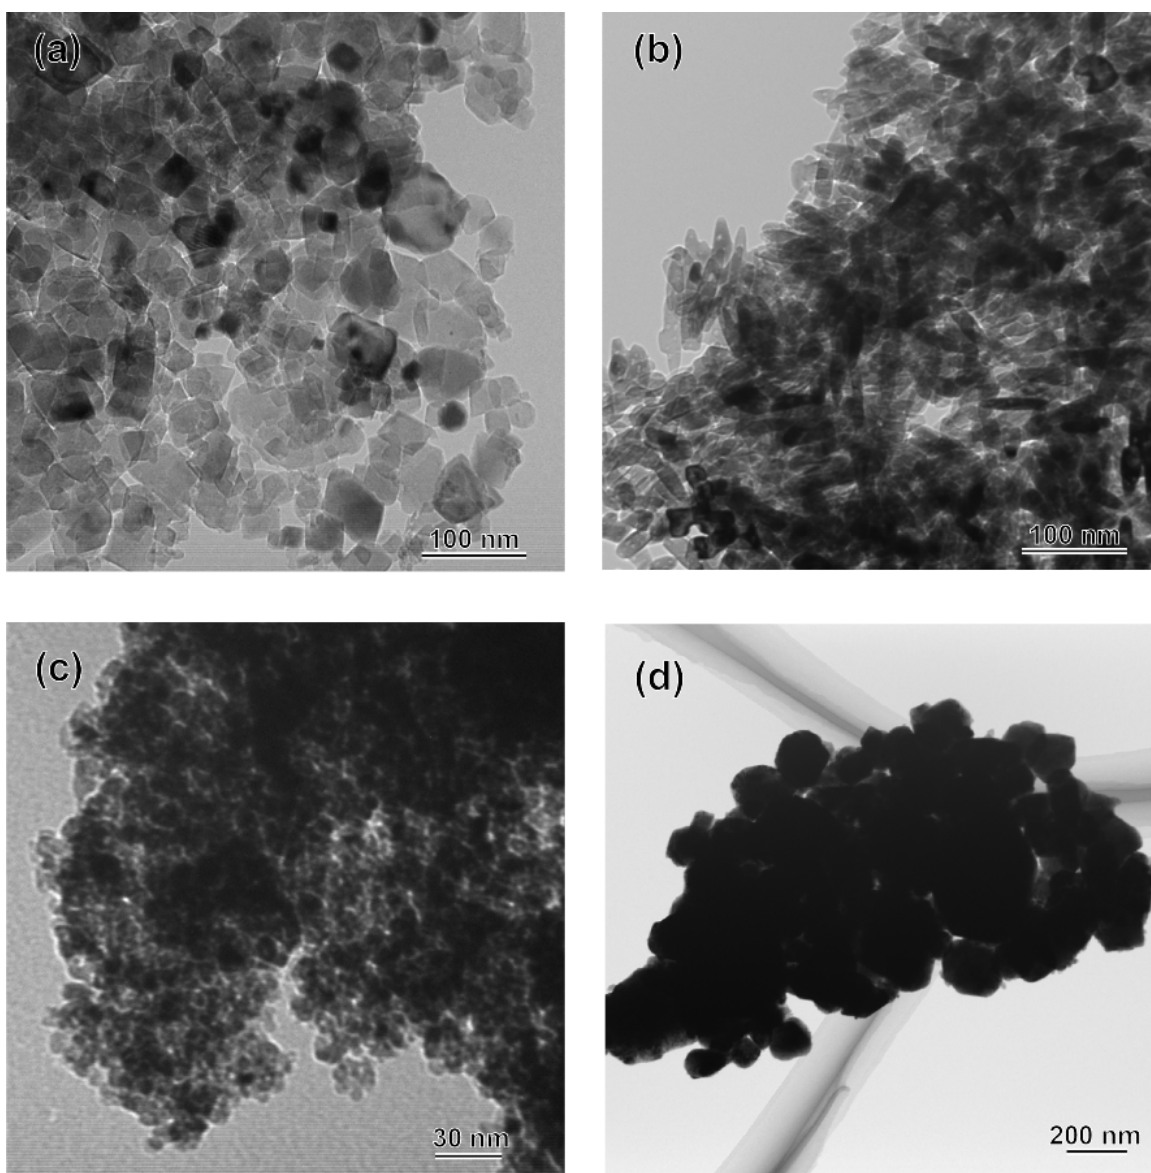

**Figure S1.** TEM image of (Pt + Zn)/MO<sub>x</sub> employing (a) MgO, (b) TiO<sub>2</sub>, (c) CeO<sub>2</sub>, and (d) WO<sub>3</sub> as supports.

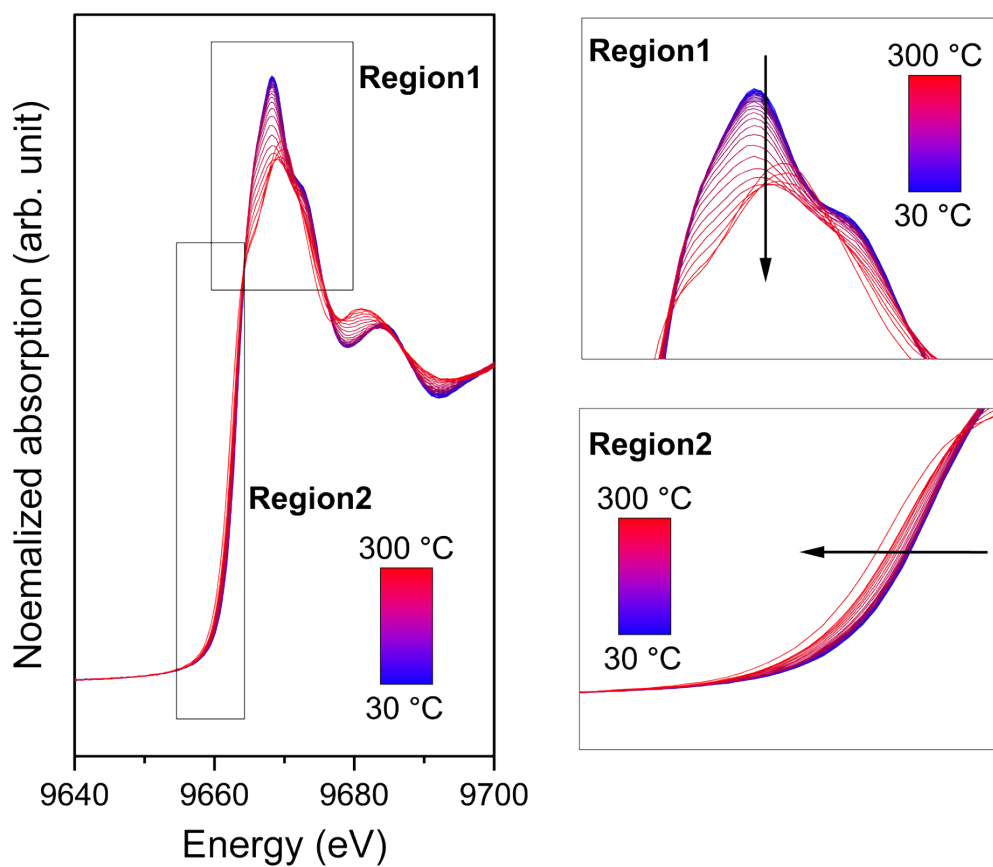

**Figure S2.** TEM image of (Pt + Zn)/MO<sub>x</sub> employing (a) MgO, (b) TiO<sub>2</sub>, (c) CeO<sub>2</sub>, and (d) WO<sub>3</sub> as supports.

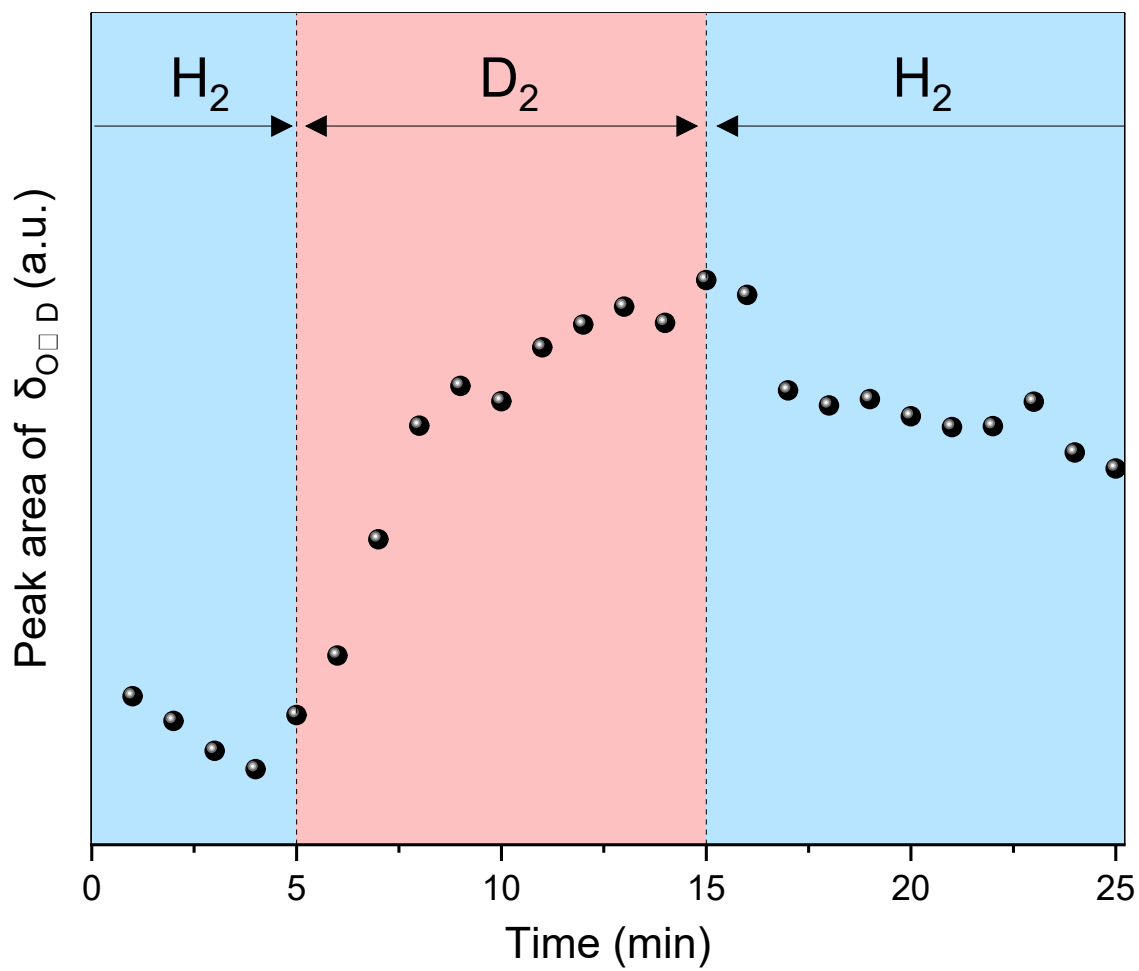

**Figure S3.** The transition of peak area assigned to the  $\delta_{O-D}$  for (Pt + Zn)/MgO during  $H_2$  and  $D_2$  switching atmosphere.

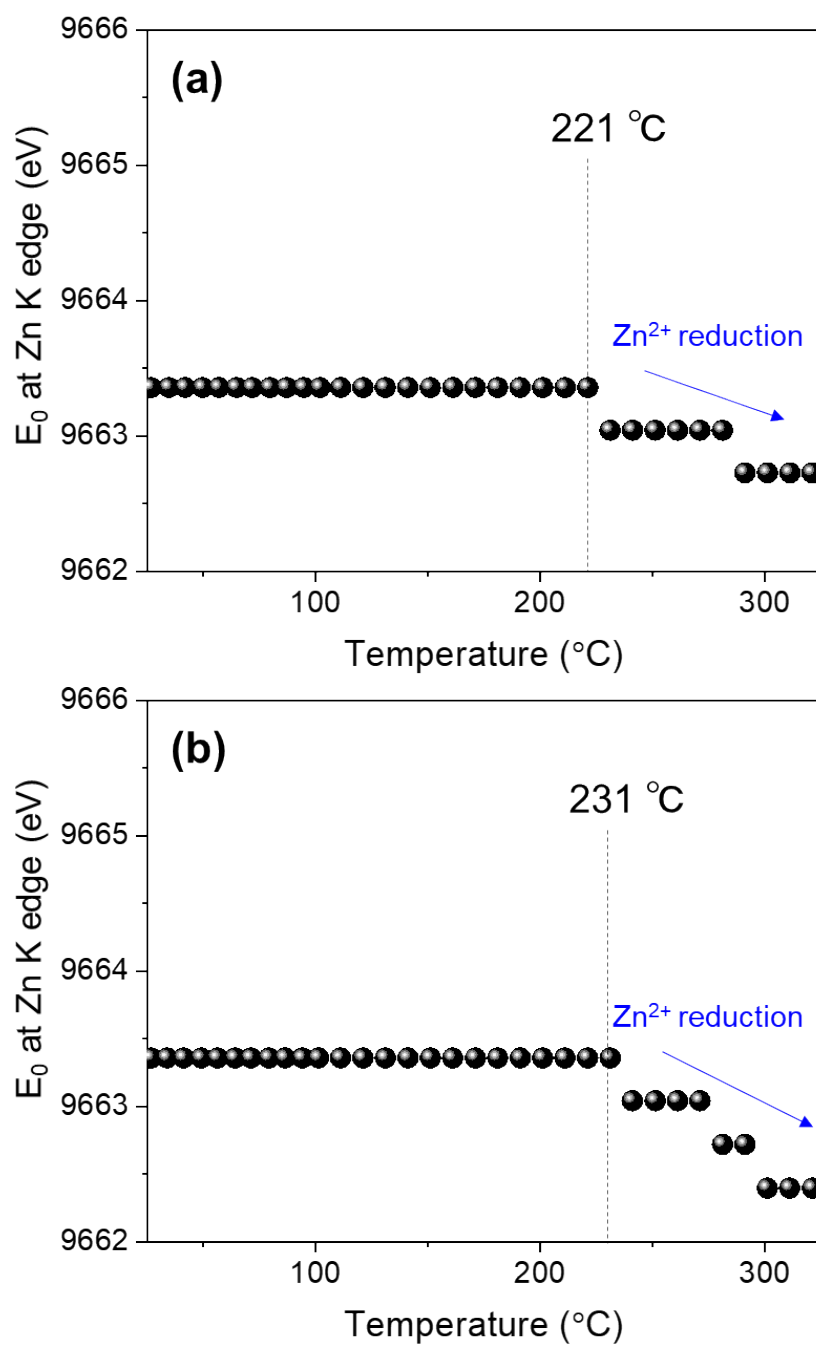

**Figure S4.** The  $E_0$  transition of the Zn K edge XANES spectra under a  $\text{D}_2$  atmosphere in trials with (a) Zn/MgO and (b) (Pt + Zn)/MgO.

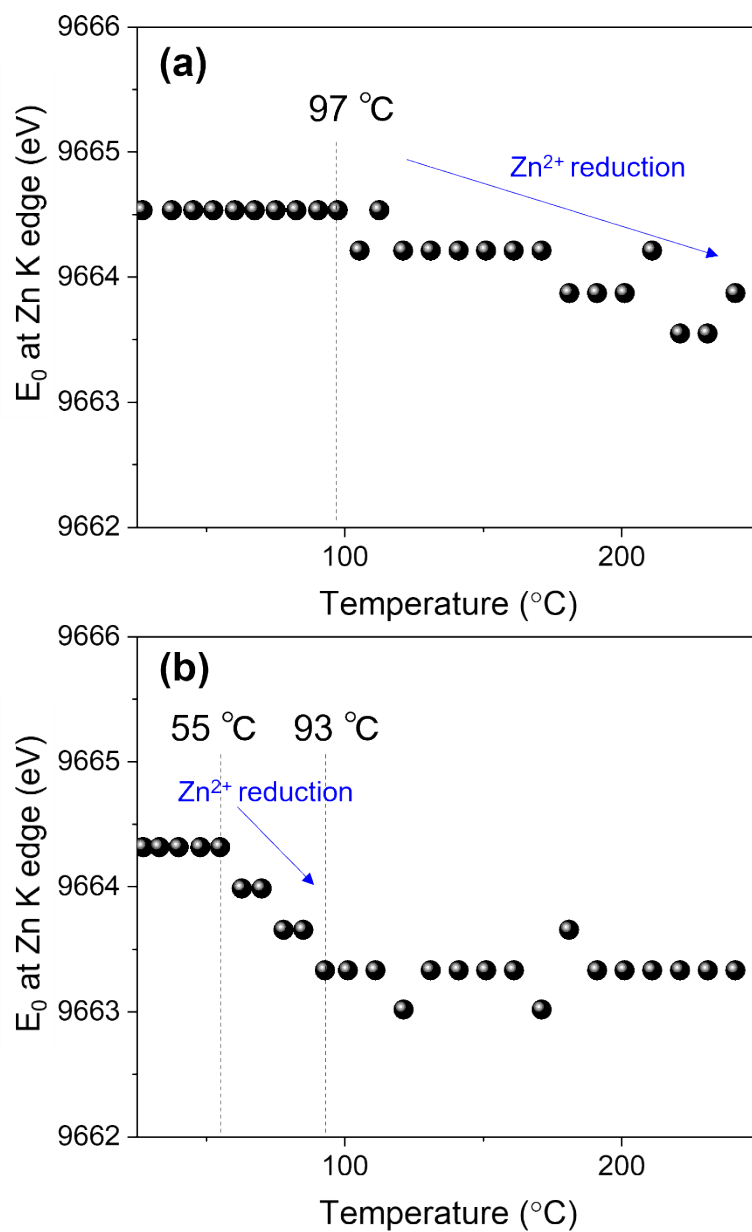

**Figure S5.** The  $E_0$  transition of the Zn K edge XANES spectra under a  $D_2$  atmosphere in trials with (a) Zn/TiO<sub>2</sub> and (b) (Pt + Zn)/TiO<sub>2</sub>.

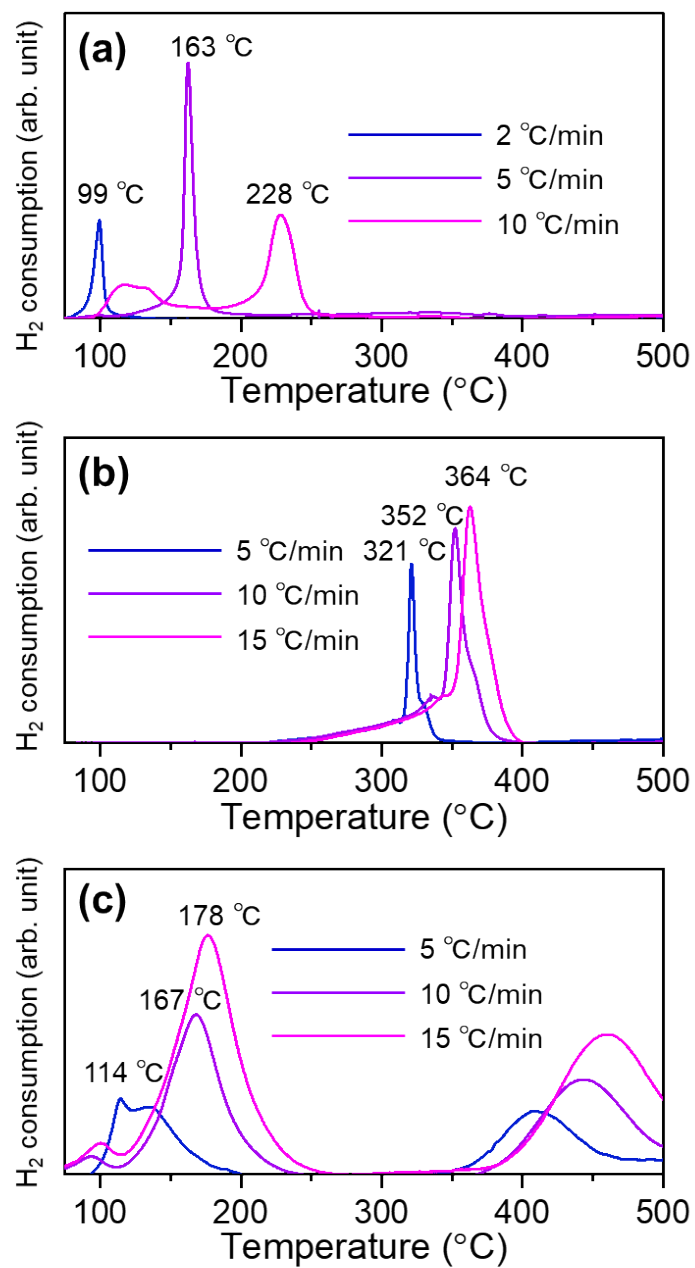

**Figure S6.** H<sub>2</sub>-TPR data acquired at various heating rates with (a) (Pt + Zn)/TiO<sub>2</sub>, (b) (Pt + Zn)/CeO<sub>2</sub>, and (c) (Pt + Zn)/WO<sub>3</sub>.

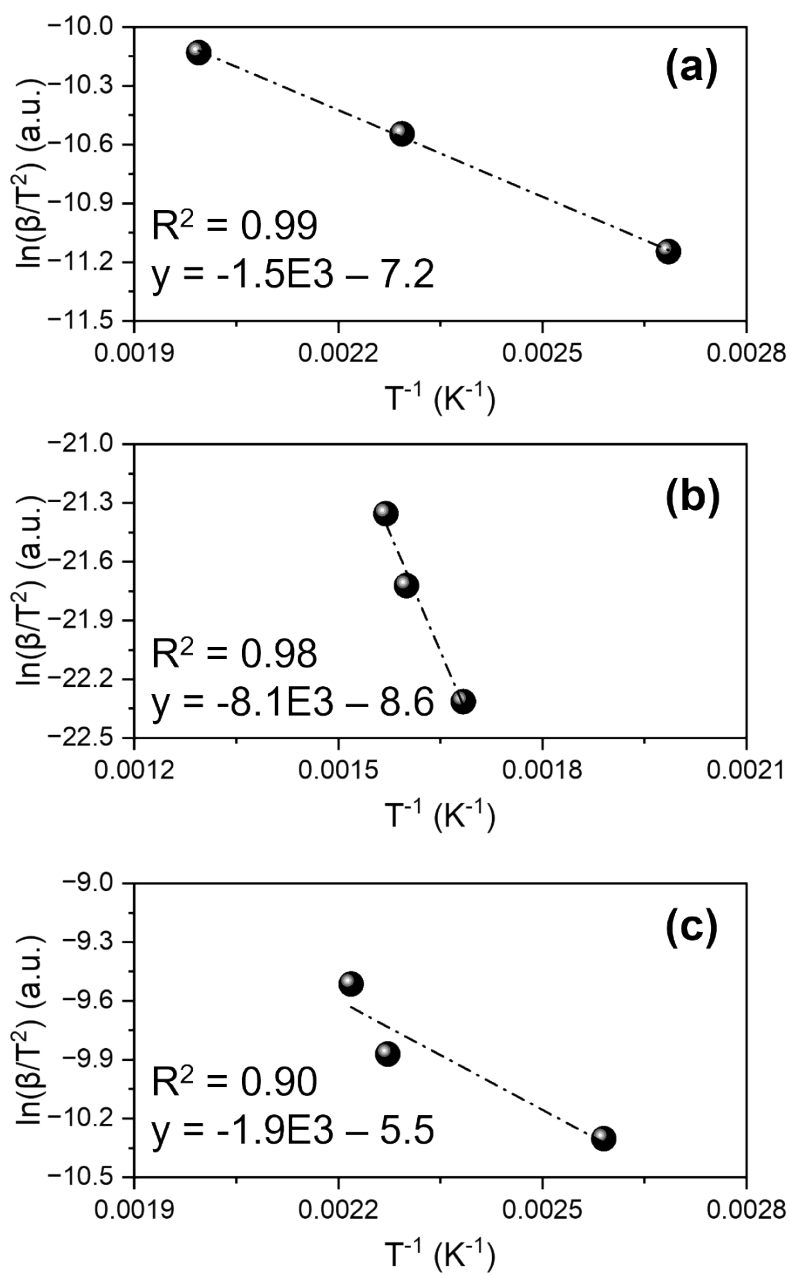

**Figure S7.** Kissinger plots and their regressions based on H<sub>2</sub>-TPR profiles calculated for (a) (Pt + Zn)/TiO<sub>2</sub>, (b) (Pt + Zn)/CeO<sub>2</sub>, and (c) (Pt + Zn)/WO<sub>3</sub>.

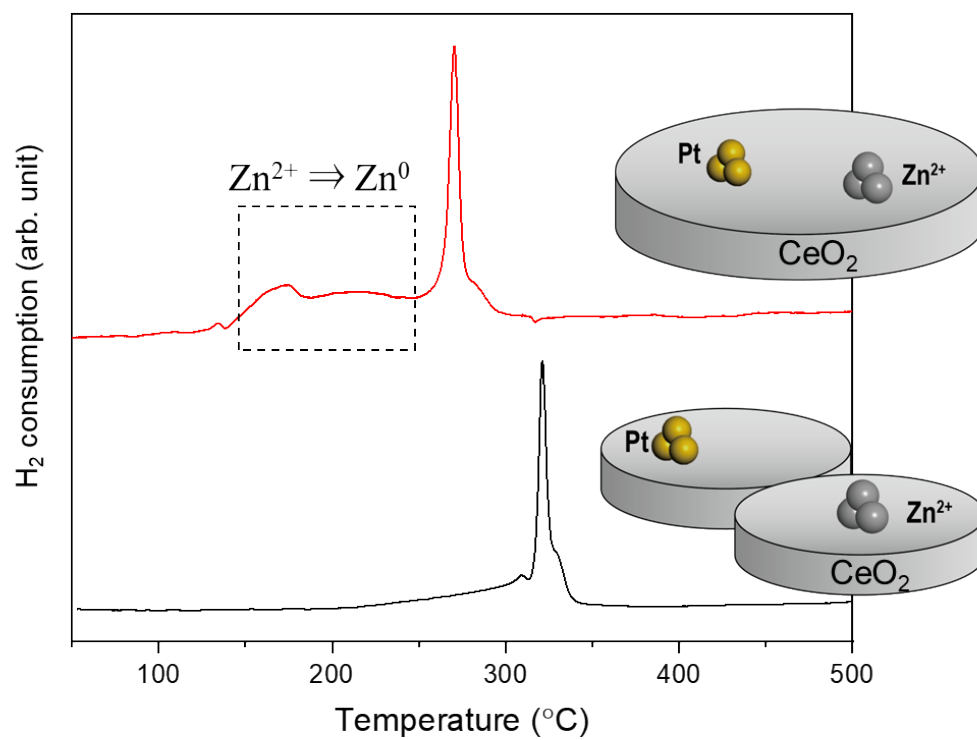

**Figure S8.** H<sub>2</sub>-TPR profiles for specimens comprising Pt and Zn supported on CeO<sub>2</sub> (red) or (Pt + Zn)/CeO<sub>2</sub> (black) at a heating rate of 5 °C/min.

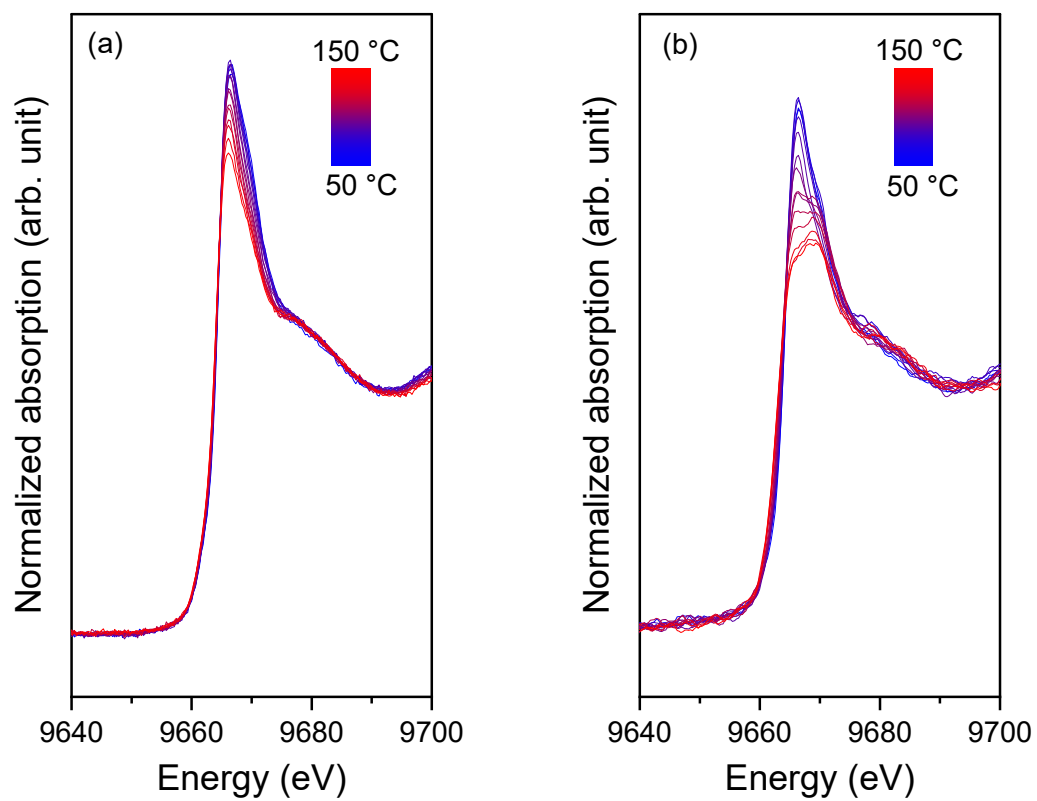

**Figure S9.** Zn K edge *in situ* XANES spectra of (a) Zn/WO<sub>3</sub> and (b) (Pt + Zn)/WO<sub>3</sub> obtained under D<sub>2</sub> at various temperatures.
